# Supplementary material for: Why Don't CD8+ T Cells Reduce the Lifespan of SIV-Infected Cells In Vivo?
Source: PLOS journal article supplement (doi:10.1371/journal.pcbi.1002200), 2011-09-29
Supplement: S1 (10.1371/journal.pcbi.1002200.s001) [file journal.pcbi.1002200.s001]

301 Moved Permanently

# Moved Permanently

The document has moved here.

---

Apache Server at www.ploscompbiol.org Port 80
